# Supplementary material for: The Evaluation of Physicomechanical and Tribological Properties of Corn Straw Fibre Reinforced Environment-Friendly Friction Composites
Source: Hindawi journal article supplement (doi:10.1155/2019/1562363), 2019-11-11
Supplement: f1 [file 1562363.f1.zip]

Archive with 7 entries (7 files):
- 1562363.f1/2018.08.mp4
- 1562363.f1/FM-0.jpg
- 1562363.f1/FM-1.jpg
- 1562363.f1/FM-3.jpg
- 1562363.f1/FM-5.jpg
- 1562363.f1/FM-7.jpg
- 1562363.f1/FM-9.jpg
