# Supplementary figures and images for: The Evaluation of Physicomechanical and Tribological Properties of Corn Straw Fibre Reinforced Environment-Friendly Friction Composites
Source: Hindawi journal article supplement (doi:10.1155/2019/1562363), 2019-11-11

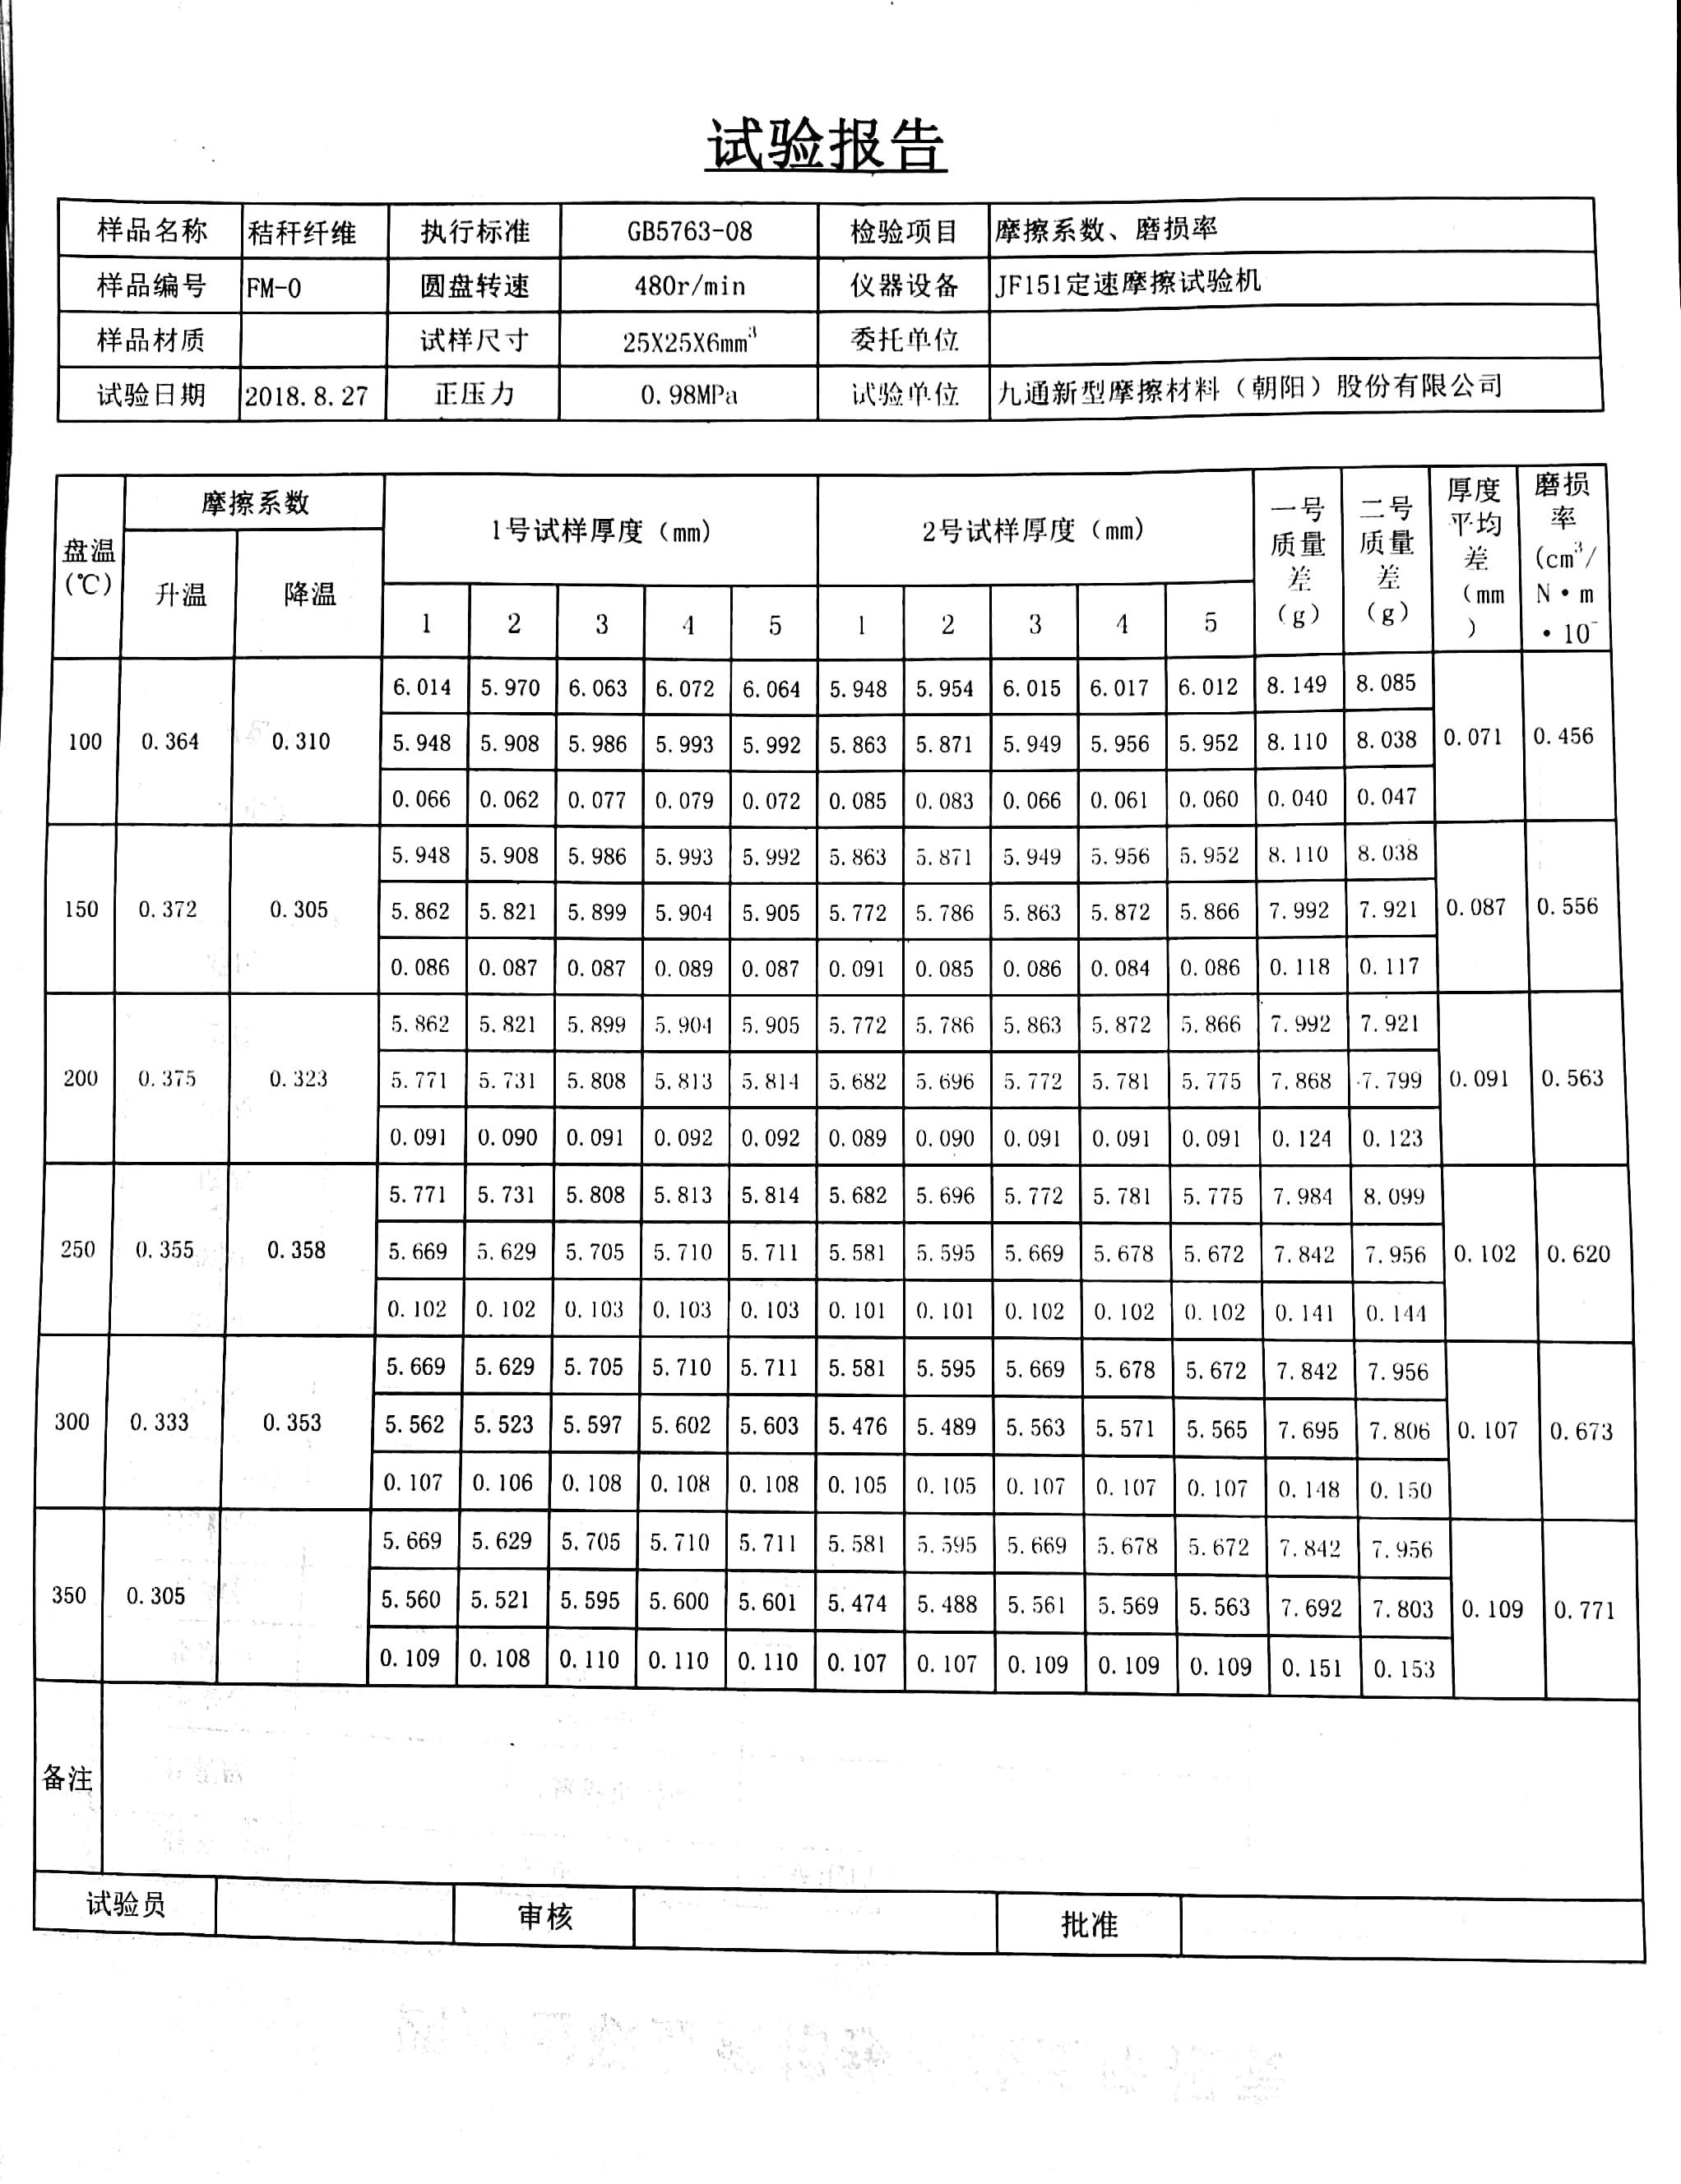

Supplement: f1 [file 1562363.f1.zip › 1562363.f1/FM-0.jpg]

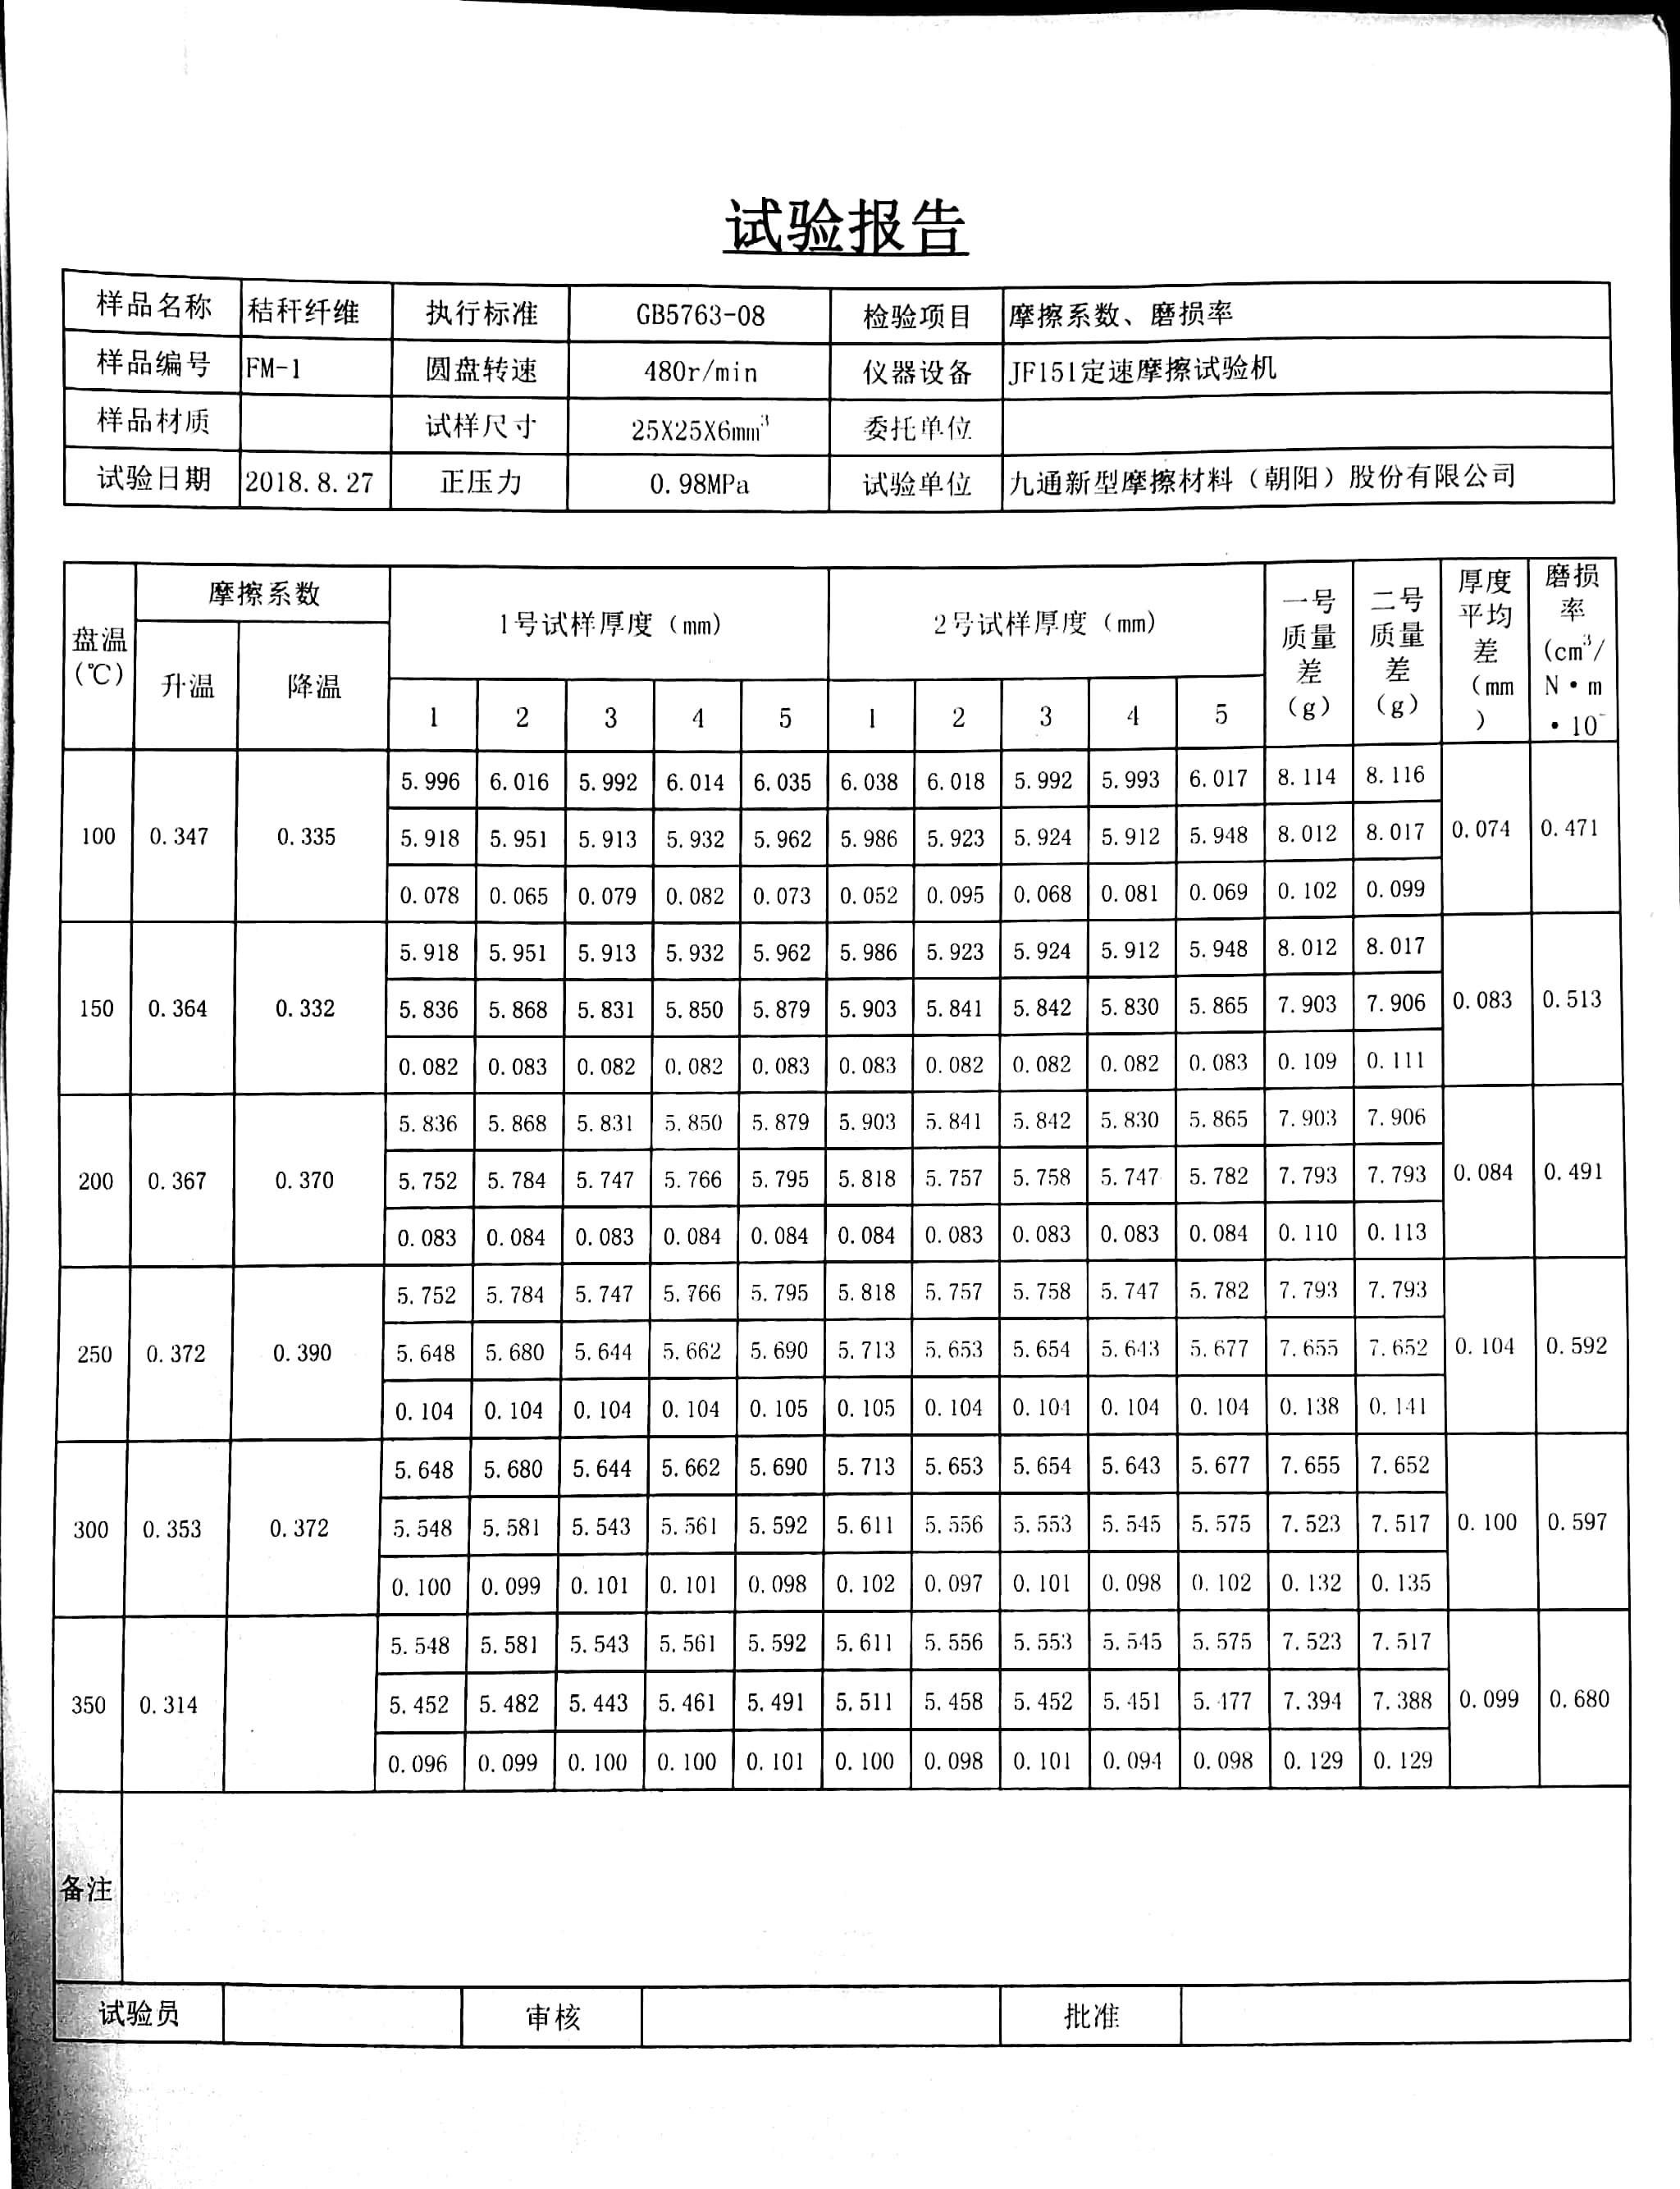

Supplement: f1 [file 1562363.f1.zip › 1562363.f1/FM-1.jpg]

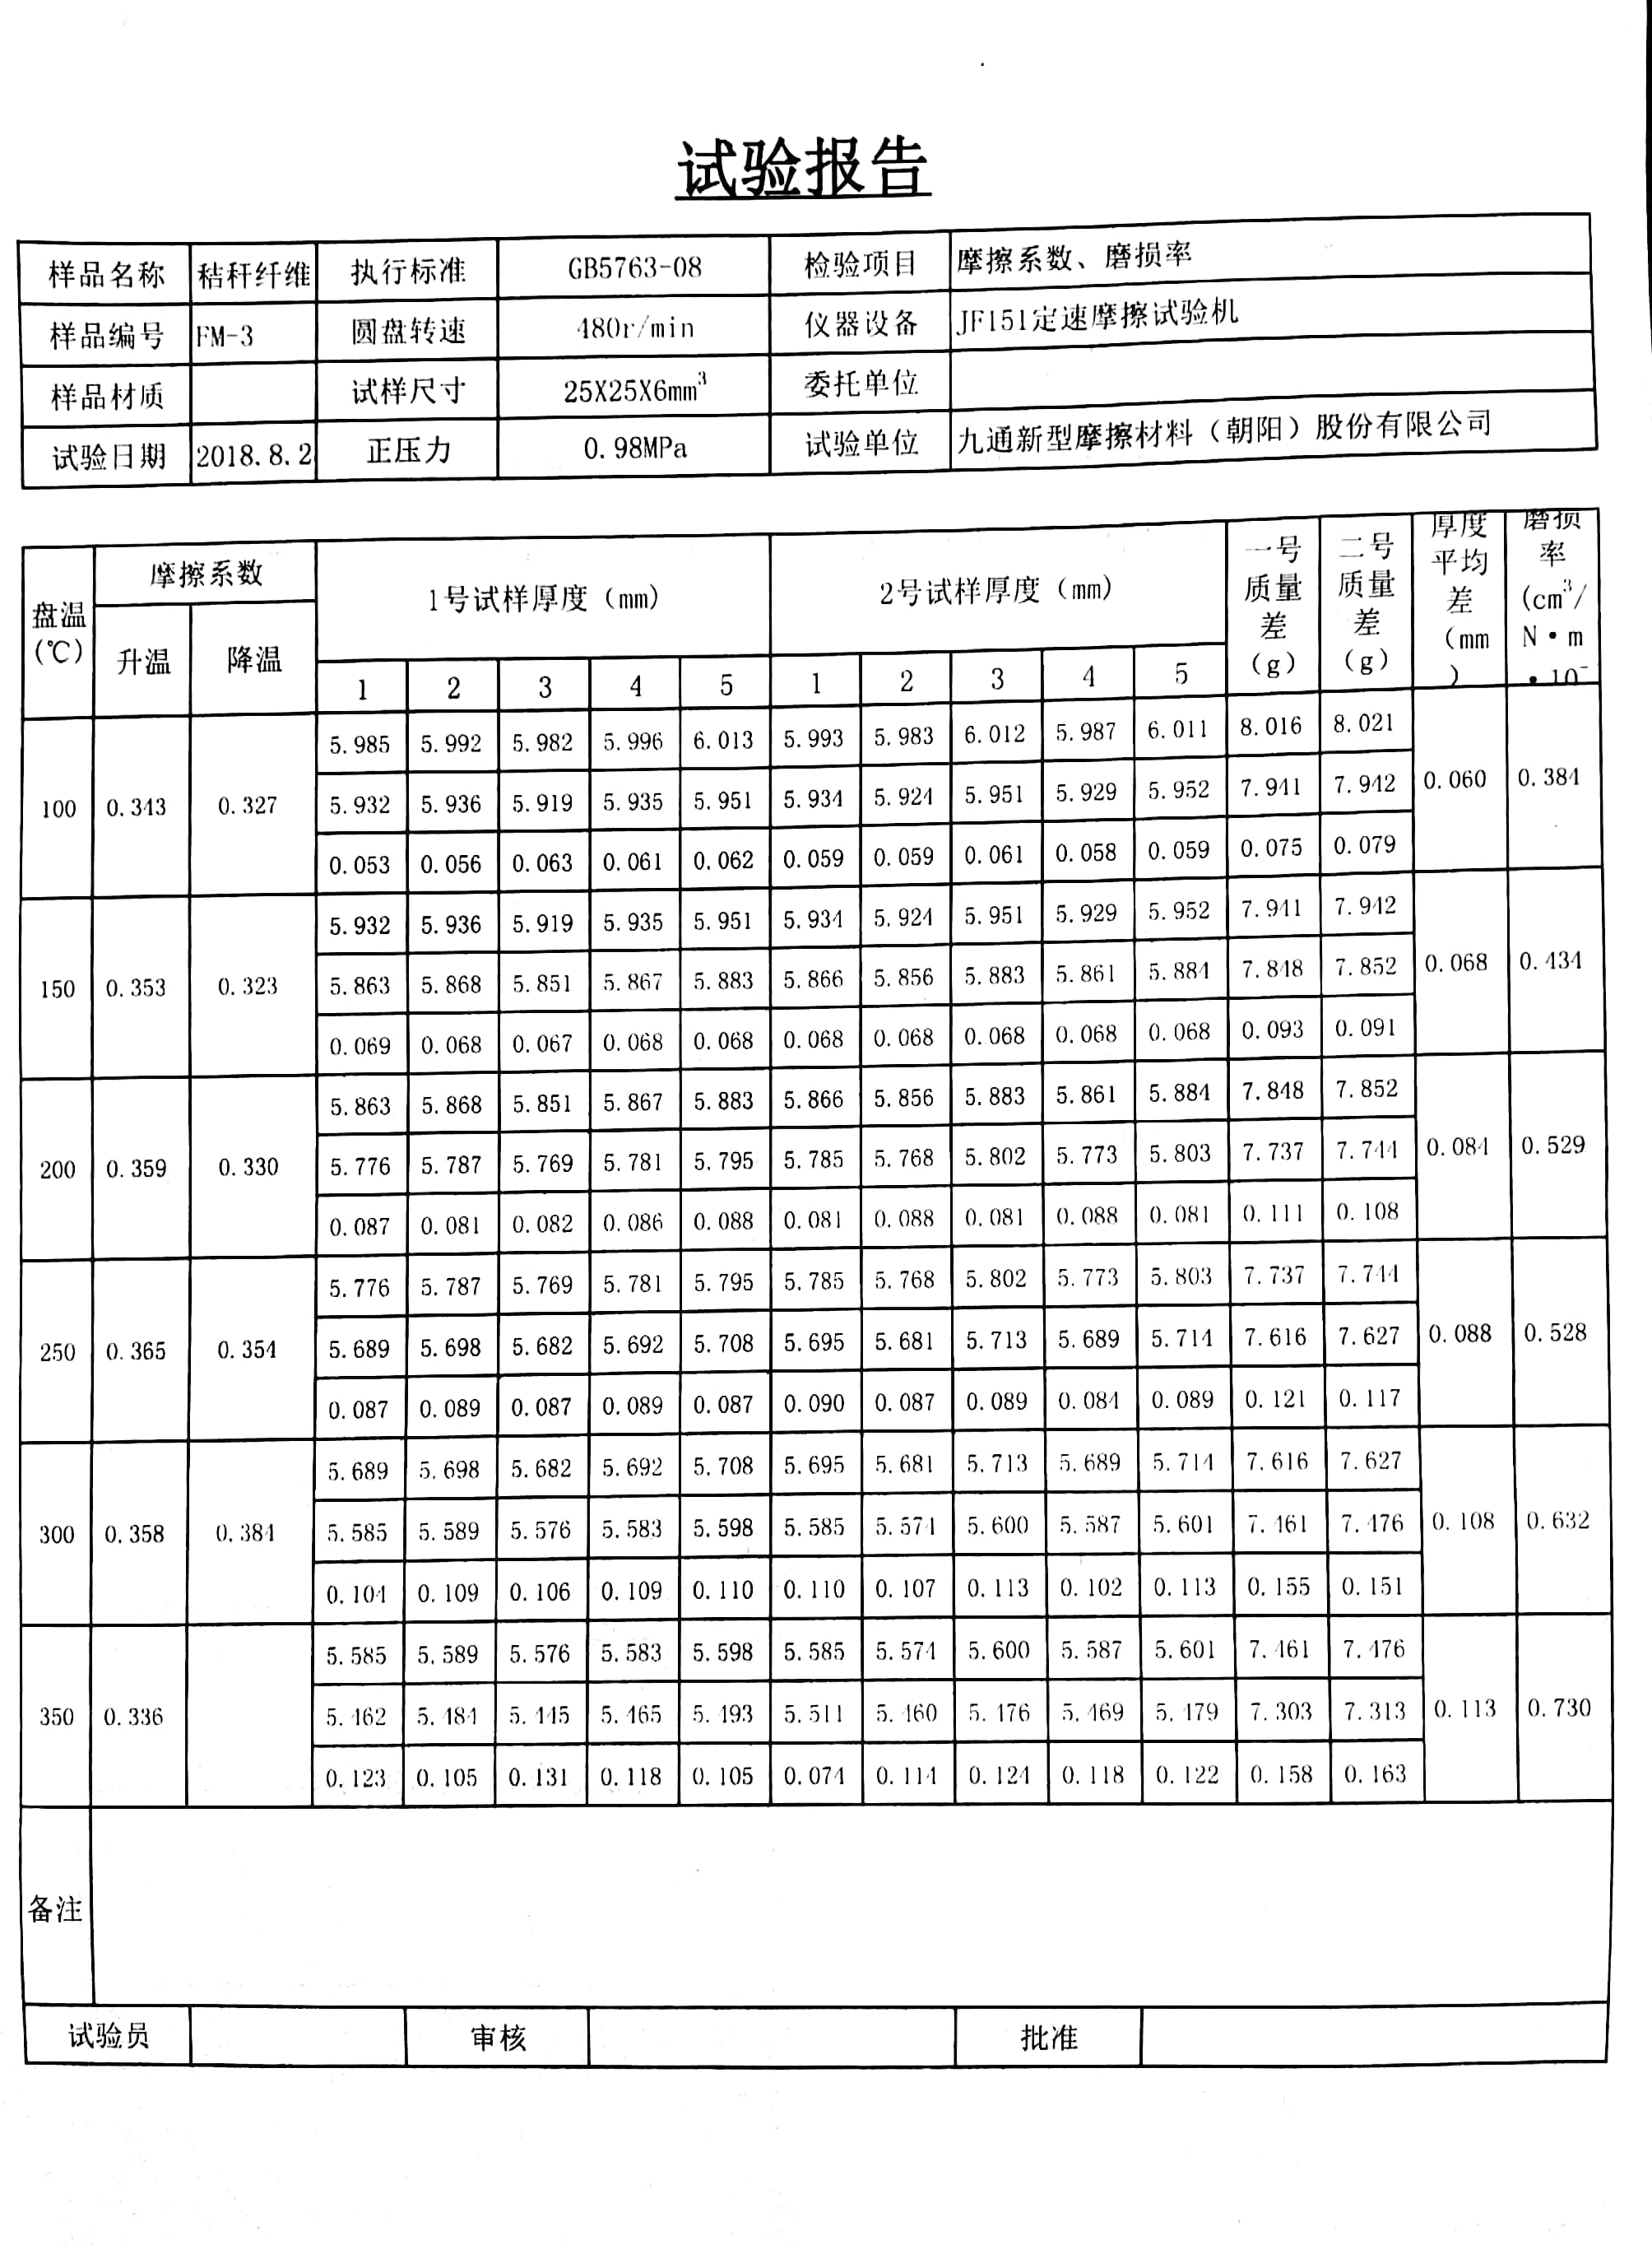

Supplement: f1 [file 1562363.f1.zip › 1562363.f1/FM-3.jpg]

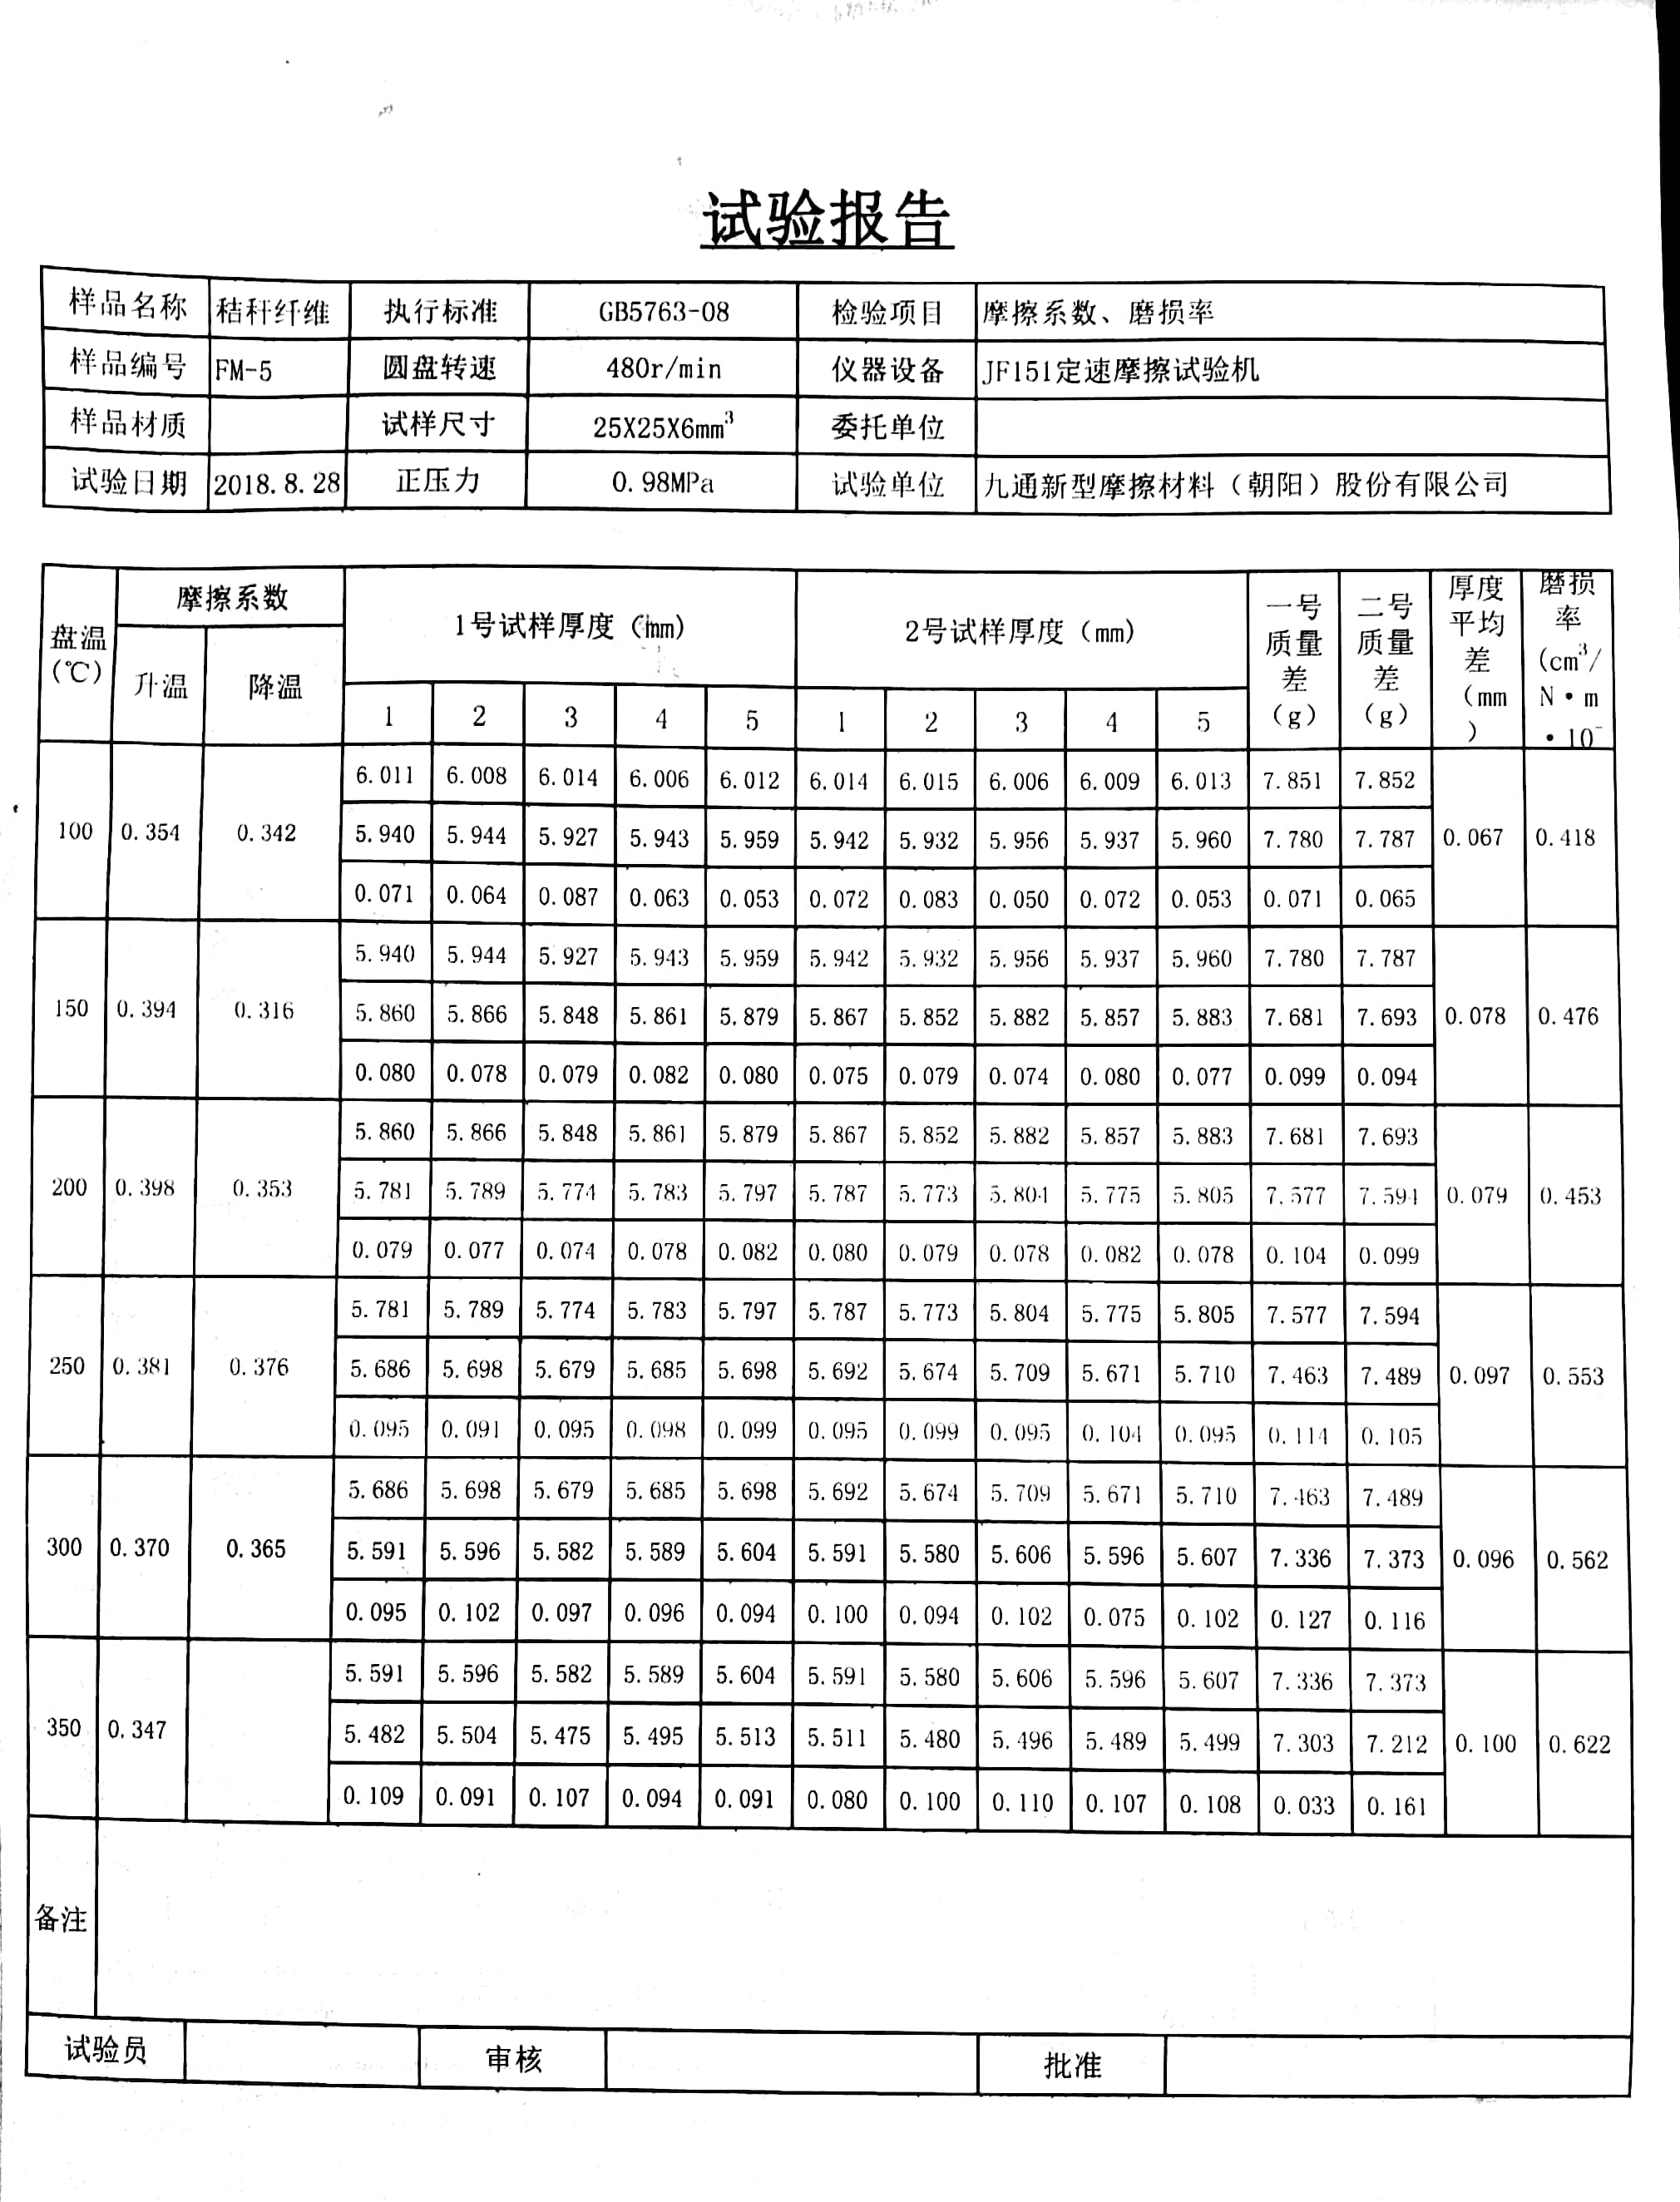

Supplement: f1 [file 1562363.f1.zip › 1562363.f1/FM-5.jpg]

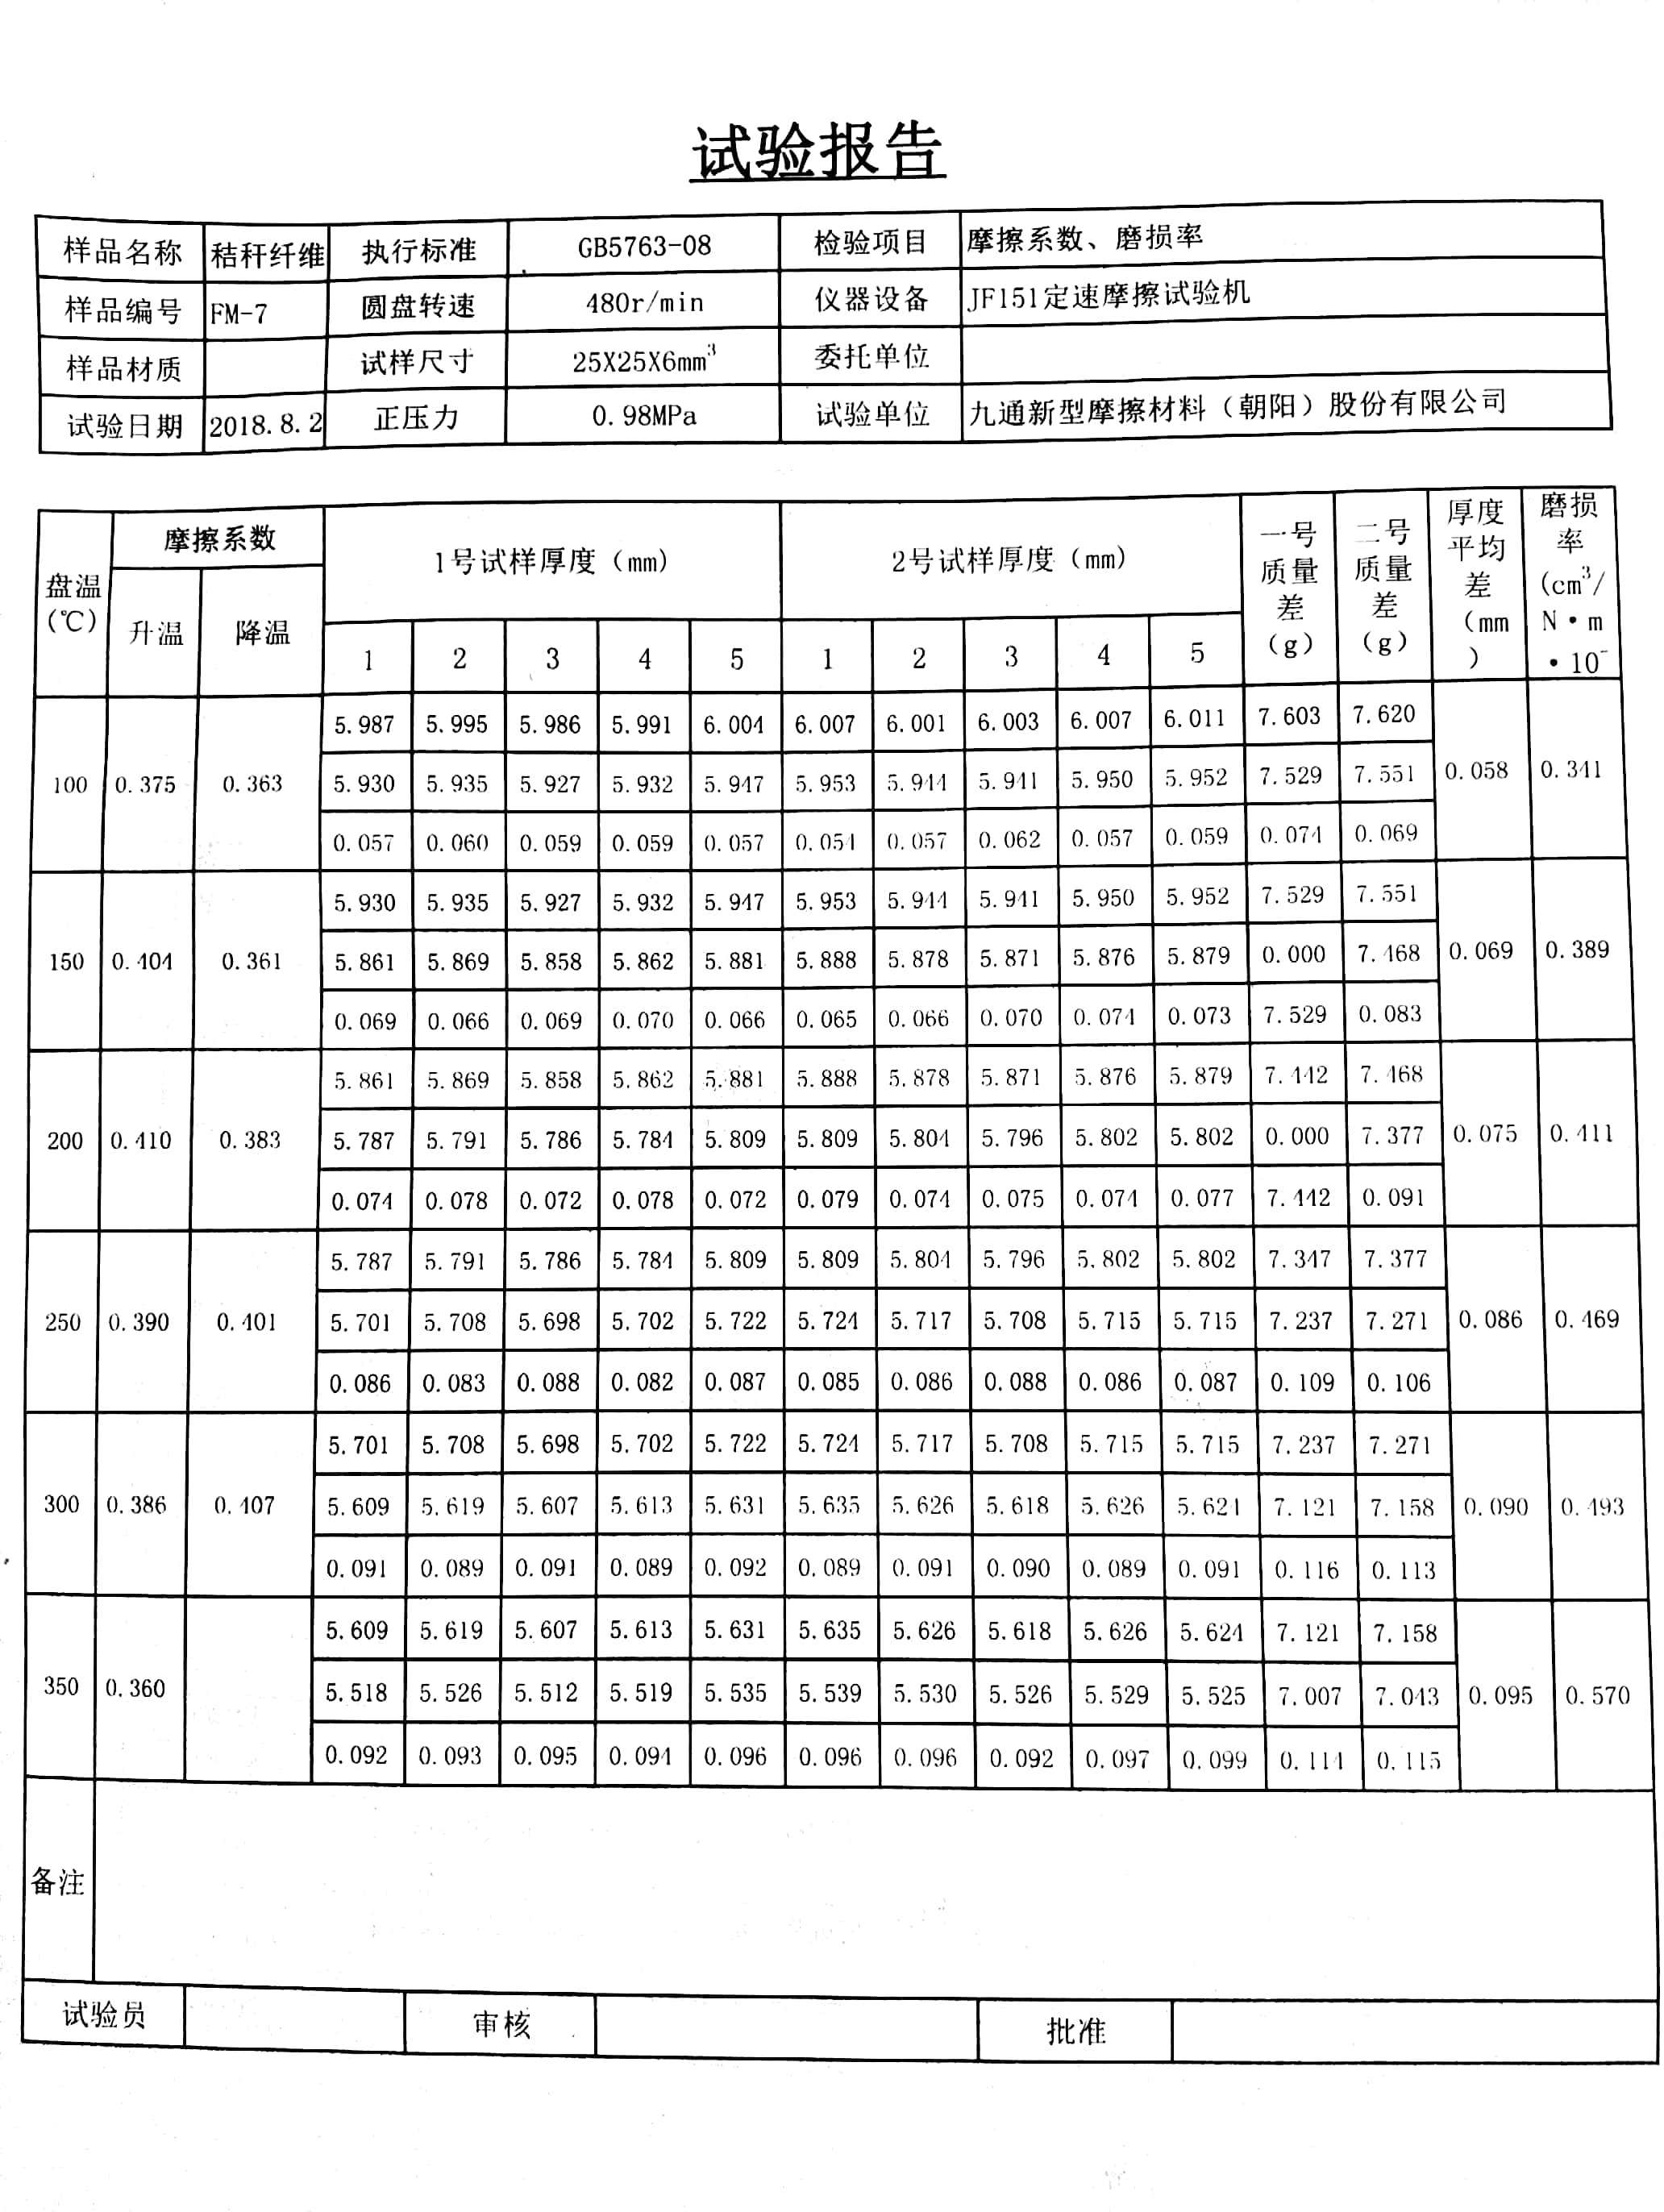

Supplement: f1 [file 1562363.f1.zip › 1562363.f1/FM-7.jpg]

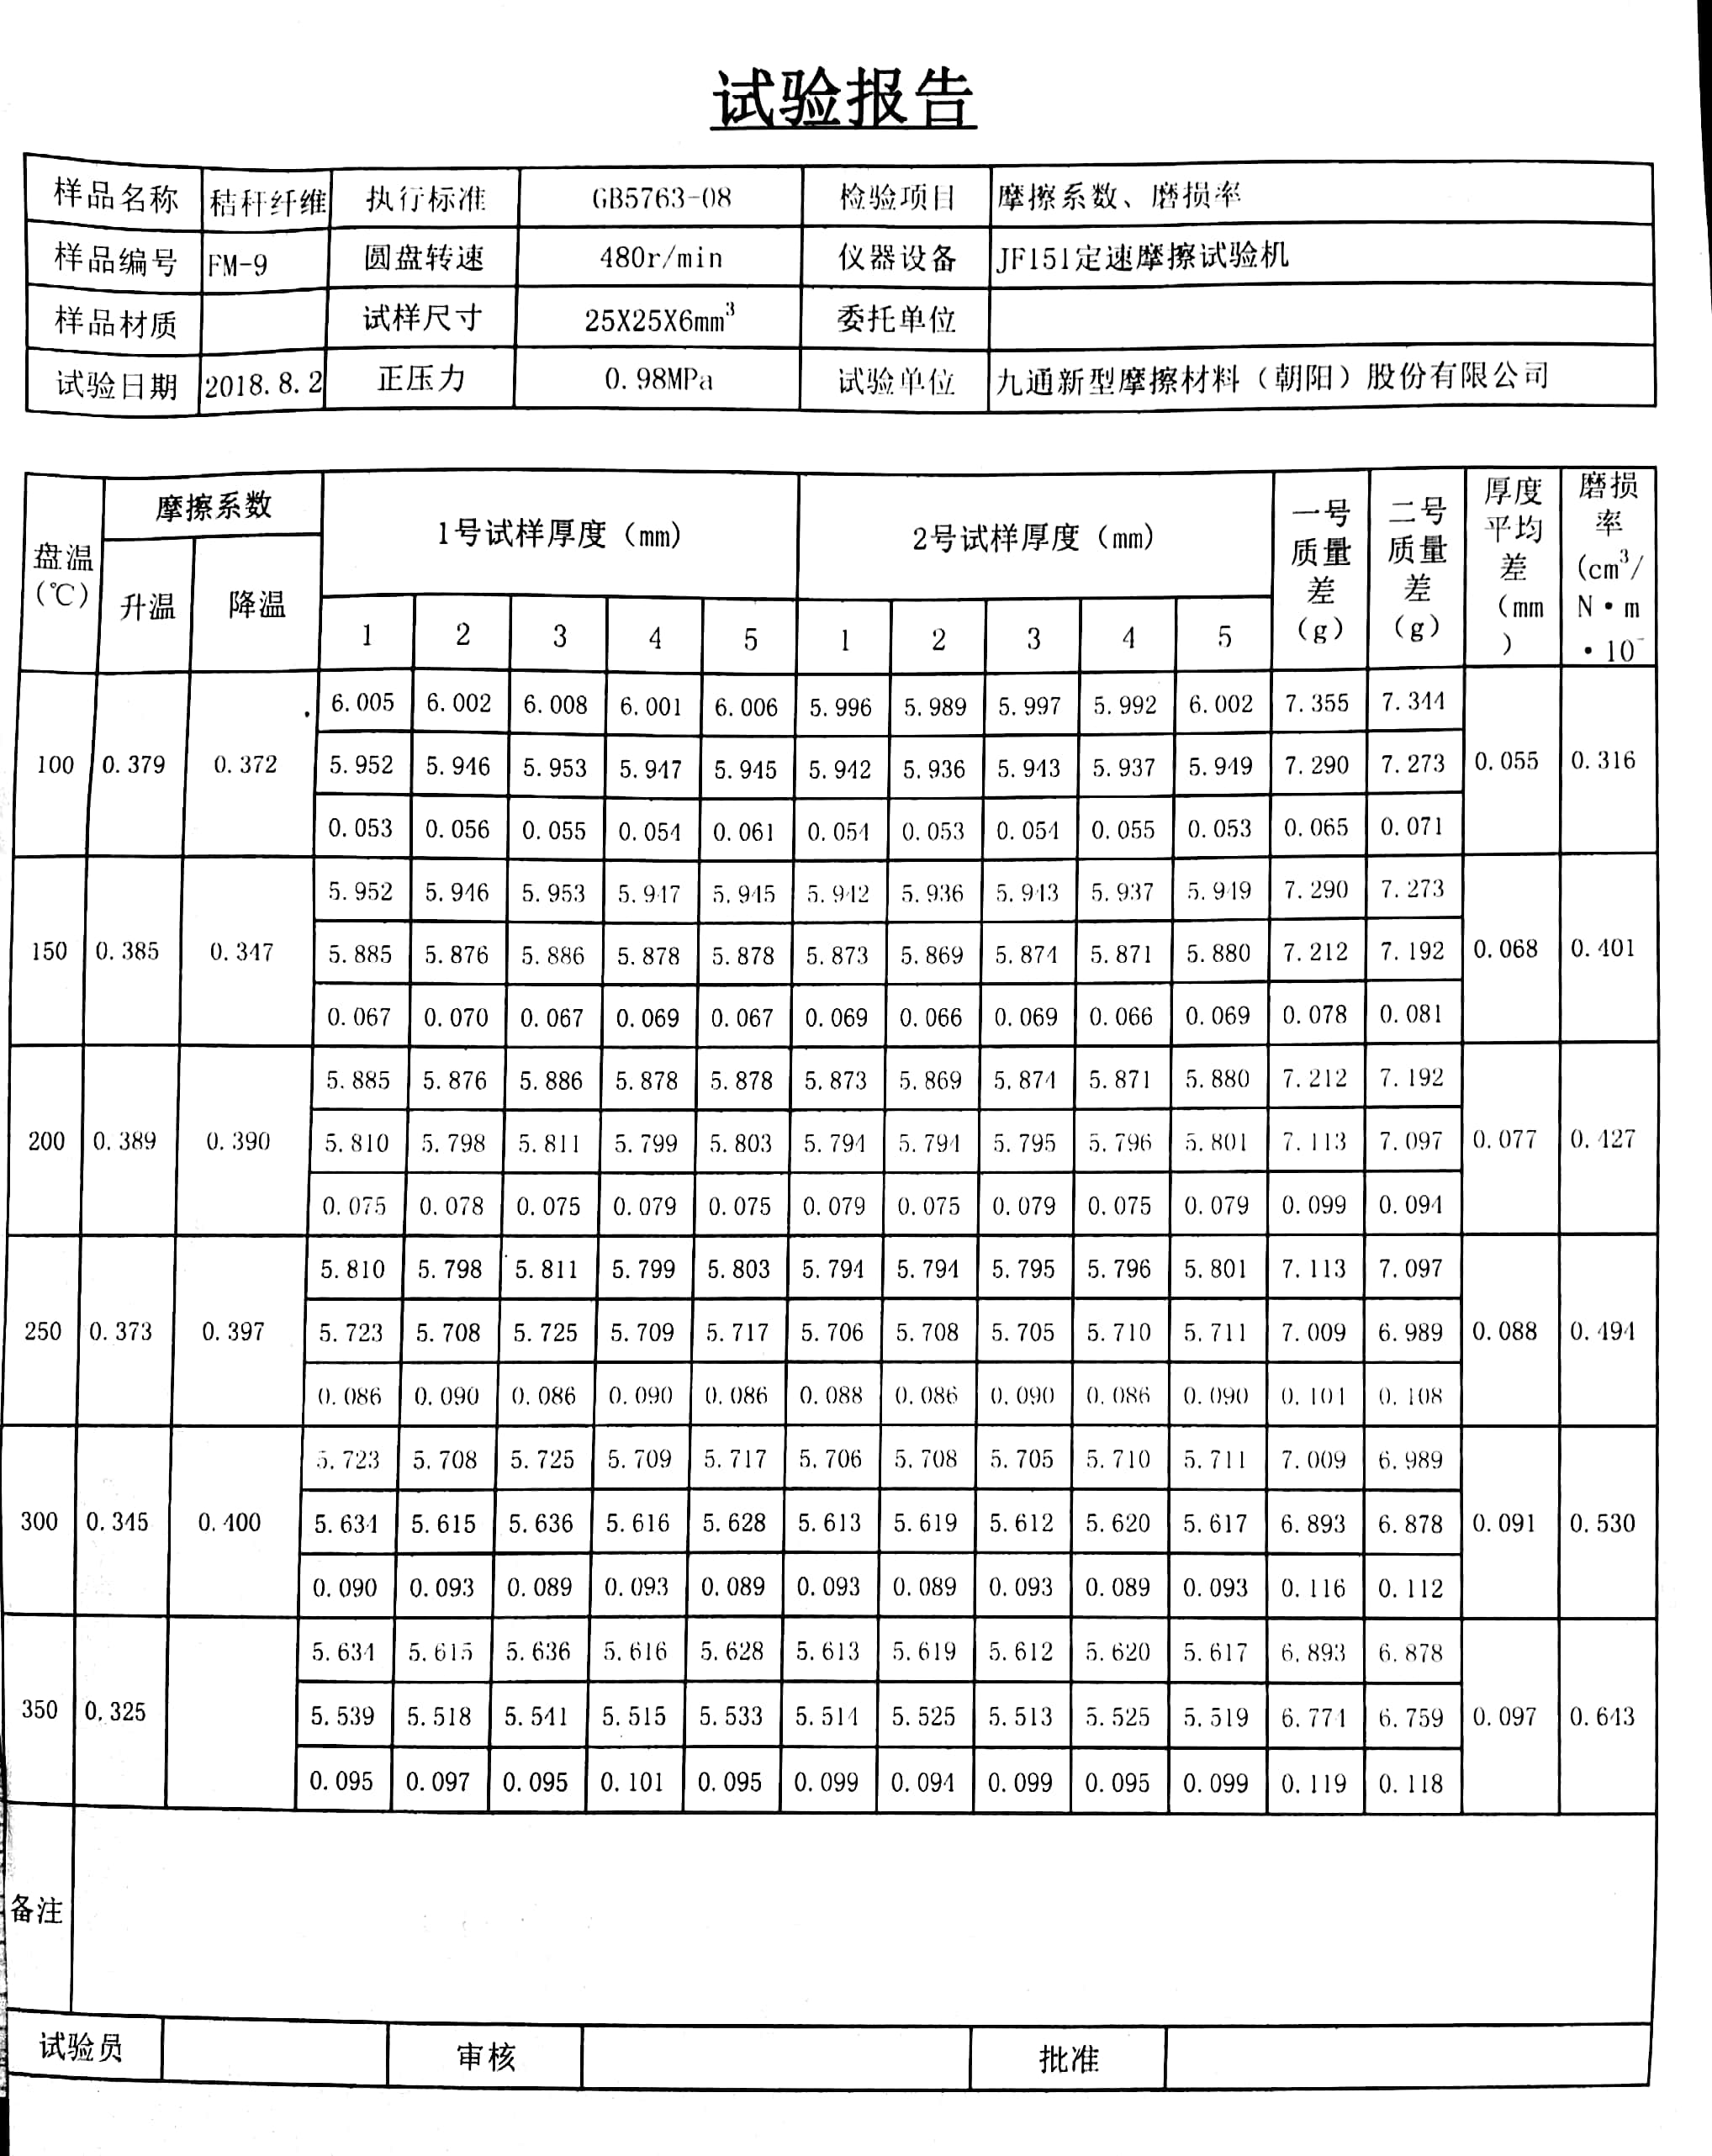

Supplement: f1 [file 1562363.f1.zip › 1562363.f1/FM-9.jpg]
